# Supplementary material
Source: MDPI journal article supplement (https://www.mdpi.com/1999-4907/12/6/696)
Supplement: s1 [file s1]

**Table S1** Sediment  $^{210}\text{Pb}$  and  $^{137}\text{Cs}$  of Huangqihai Lake

| Depth | Sample weight<br>(g) | Cs-137 (Bq/kg) |      | Pb-210 (Bq/kg) |       |
|-------|----------------------|----------------|------|----------------|-------|
|       |                      | Activity       | A.U. | Activity       | A.U.  |
| 1-2   | 13.9                 | 15.28          | 1.96 | 122.34         | 17.24 |
| 2-3   | 10.66                | 15.8           | 1.91 | 143.71         | 17.94 |
| 4-5   | 20.13                | 13.99          | 1.61 | 97.33          | 14.22 |
| 7-8   | 17.28                | 11.68          | 1.68 | 98.32          | 14.35 |
| 8-9   | 17.36                | 15.39          | 1.84 | 85.68          | 13.24 |
| 9-10  | 23.62                | 20.15          | 1.7  | 90.26          | 12.14 |
| 11-12 | 15.11                | 44.34          | 3.27 | 87.94          | 14.3  |

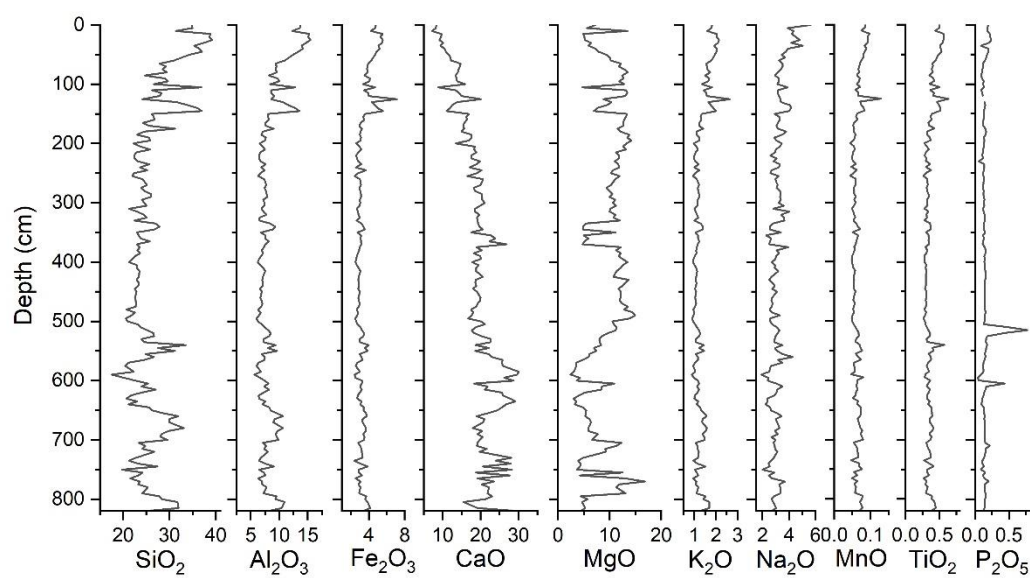

**Figure S1.** Chemical element composition (%) change in the sediment of Huangqihai Lake profile

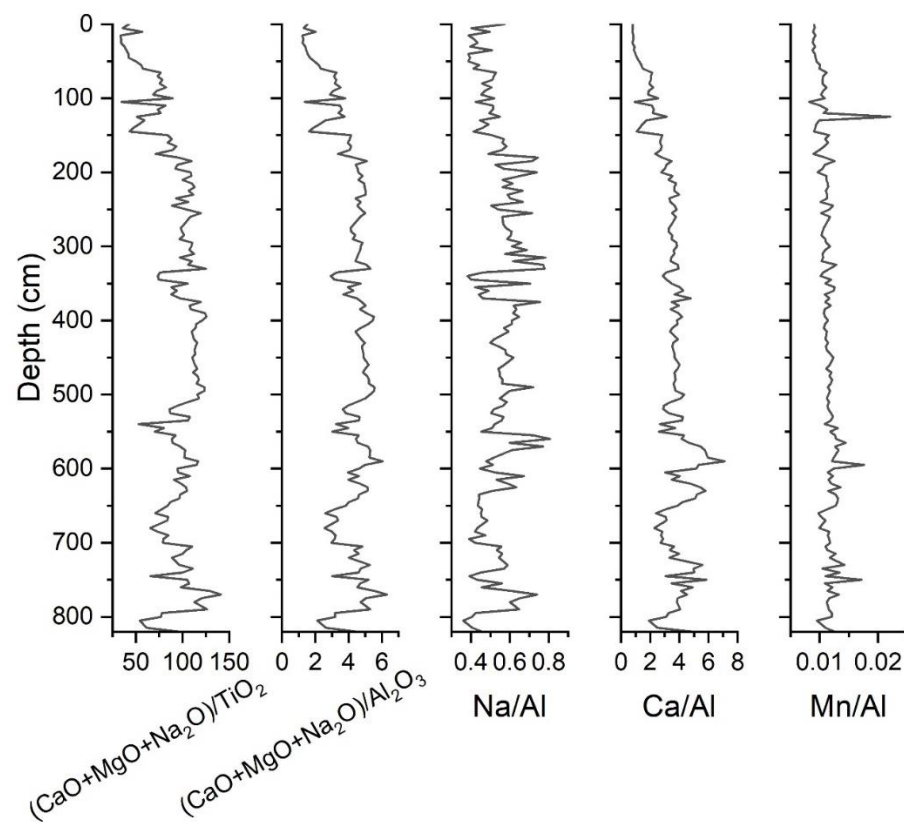

**Figure S2.** Chemical element ratios change in the sediment of Huangqihai Lake profile

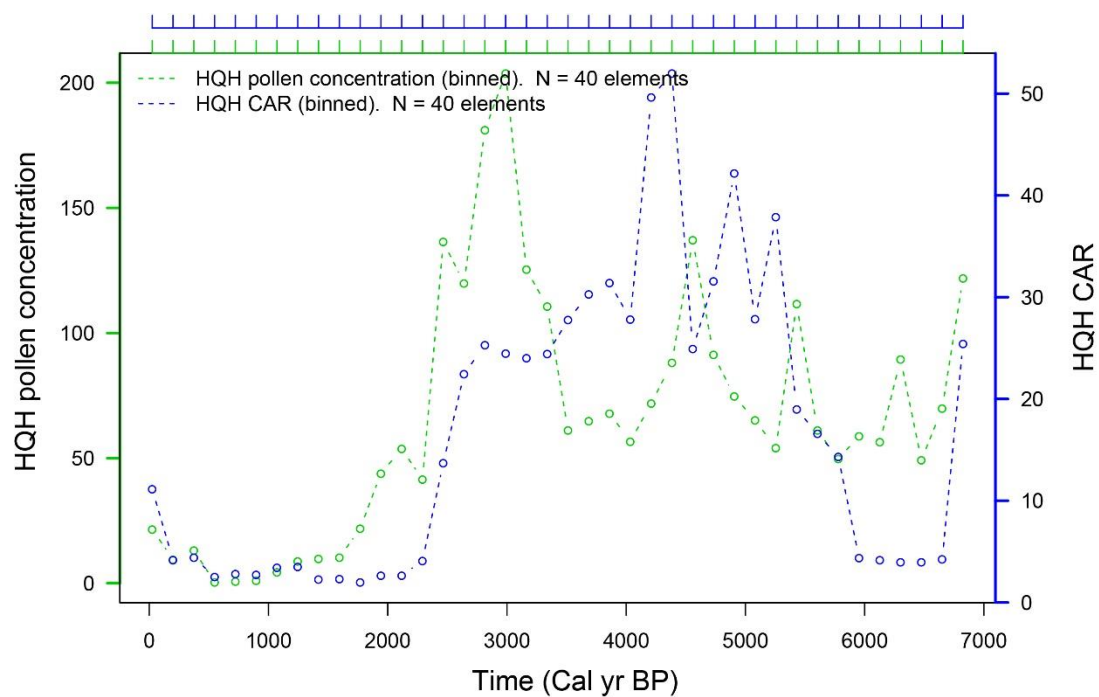

**Figure S3.** Binned correlation of Huangqihai Lake pollen density and CAR by BINCOR
